# Supplementary material for: Successful resection of pancreatic head cancer in a patient with circumportal pancreas: a case report with technical consideration
Source: publisher site journal article supplement (doi:10.1515/iss-2017-0003), 2017-02-28
Supplement: Supplementary file 1 [file j_iss-2017-0003_suppl.pdf]

## Reviewer Assessment

## Open Access

Hiroshi Kawamoto, Takahisa Fujikawa\* and Akira Tanaka

# Successful resection of pancreatic head cancer in a patient with circumportal pancreas: a case report with technical consideration

DOI 10.1515/iss-2017-0003

Received December 30, 2016; accepted January 19, 2017

\*Corresponding author: Takahisa Fujikawa,

Department of Surgery, Kokura Memorial Hospital, 3-2-1, Asano, Kokurakita-ku, Kitakyushu, Fukuoka 802-8555, Japan,

E-mail: fujikawa-t@kokurakinen.or.jp

## Reviewers' Comments to Original Submission

### Reviewer 1: Sören T. Mees

Jan 05, 2017

|                                                                   |                            |
|-------------------------------------------------------------------|----------------------------|
| <b>Reviewer Recommendation Term:</b>                              | Accept with Minor Revision |
| <b>Overall Reviewer Manuscript Rating:</b>                        | 60                         |
| <b>Custom Review Questions</b>                                    | <b>Response</b>            |
| Is the subject area appropriate for you?                          | 5 - High/Yes               |
| Does the title clearly reflect the paper's content?               | 5 - High/Yes               |
| Does the abstract clearly reflect the paper's content?            | 4                          |
| Do the keywords clearly reflect the paper's content?              | 5 - High/Yes               |
| Does the introduction present the problem clearly?                | 4                          |
| Are the results/conclusions justified?                            | 4                          |
| How comprehensive and up-to-date is the subject matter presented? | 4                          |
| How adequate is the data presentation?                            | 4                          |
| Are units and terminology used correctly?                         | N/A                        |
| Is the number of cases adequate?                                  | N/A                        |
| Are the experimental methods/clinical studies adequate?           | N/A                        |
| Is the length appropriate in relation to the content?             | 4                          |
| Does the reader get new insights from the article?                | 4                          |
| Please rate the practical significance.                           | 2                          |
| Please rate the accuracy of methods.                              | N/A                        |
| Please rate the statistical evaluation and quality control.       | N/A                        |
| Please rate the appropriateness of the figures and tables.        | 4                          |
| Please rate the appropriateness of the references.                | 3                          |
| Please evaluate the writing style and use of language.            | 3                          |
| Please judge the overall scientific quality of the manuscript.    | 3                          |
| Are you willing to review the revision of this manuscript?        | Yes                        |

### Comments to Authors:

The authors present a case report dealing with a resection of a pancreatic head cancer in a patient with circumportal pancreas. A circumportal pancreas is rare but its handling during surgery is important for HPB surgeons. Therefore, the case report is of interest for a medium-sized readership. Although there are some case reports/ studies listed in pubmed dealing with this topic, the surgical treatment has not been described in detail so far. Thus, I consider this case report as suitable for publication in ISS.

#### Minor issues:

- The paper should be revised by a native speaker as it contains errors in grammar and syntax e.g. But this procedure --have-- a disadvantage --that-- it needs additional dissection or resection and, as a result, may cause secondary damages, and --also have one that-- the cutting plane at the pancreas body may be larger than that on SMV/PV. Moreover, the deterioration in the remnant pancreas function may be --concerned--.
- Case report, p3, last sentence: Why was the patient discharged on POD36 in an uneventful postoperative course?
- Please consider the citation of the following literature as it may add valuable information for the reader: PMID 27826941 (surgical treatment!) / 25626884 / 25248793

## Reviewer 2: Markus K. Diener

Jan 04, 2017

|                                            |                            |
|--------------------------------------------|----------------------------|
| <b>Reviewer Recommendation Term:</b>       | Accept with Minor Revision |
| <b>Overall Reviewer Manuscript Rating:</b> | 70                         |

#### Custom Review Questions

|                                                                   | Response     |
|-------------------------------------------------------------------|--------------|
| Is the subject area appropriate for you?                          | 5 - High/Yes |
| Does the title clearly reflect the paper's content?               | 4            |
| Does the abstract clearly reflect the paper's content?            | 4            |
| Do the keywords clearly reflect the paper's content?              | 4            |
| Does the introduction present the problem clearly?                | 4            |
| Are the results/conclusions justified?                            | 4            |
| How comprehensive and up-to-date is the subject matter presented? | 3            |
| How adequate is the data presentation?                            | 3            |
| Are units and terminology used correctly?                         | 4            |
| Is the number of cases adequate?                                  | N/A          |
| Are the experimental methods/clinical studies adequate?           | N/A          |
| Is the length appropriate in relation to the content?             | 5 - High/Yes |
| Does the reader get new insights from the article?                | 4            |
| Please rate the practical significance.                           | 3            |
| Please rate the accuracy of methods.                              | N/A          |
| Please rate the statistical evaluation and quality control.       | N/A          |
| Please rate the appropriateness of the figures and tables.        | 4            |
| Please rate the appropriateness of the references.                | 2            |
| Please evaluate the writing style and use of language.            | 2            |
| Please judge the overall scientific quality of the manuscript.    | 3            |
| Are you willing to review the revision of this manuscript?        | Yes          |

#### Comments to Authors:

The authors present a case of a patient undergoing pancreaticoduodenectomy with the intraoperative finding of retroportal pancreas. This case Report is interesting, since rare findings in surgery must be published in such a way. However, please allow me several comments:

1. Grammar and style has to be corrected; suggest to involve a native Speaker
2. It is not clear enough, if the finding of a retroportal pancreas was known preoperatively. The authors say so, but why didn't they dissect the pancreas on a plane left to the portal vein?
3. Since this anatomical variation is rare; the authors should precisely display the available evidence within this topic. I definitively appreciate the technical remarks, but however, the authors should go into the literature and Report complications and fistula rates after the reported technical variations (if available).

## Authors' Response to Reviewer Comments

Jan 12, 2017

Thank you for your January 6th letter according to our manuscript entitled, "Successful resection of pancreatic head cancer in a patient with circumportal pancreas: a case report with technical consideration" (Manuscript ID ISS-2017-0003).

I prepared herein our revised manuscript including figures. Our incorporation of the reviewer's suggestion is as follows:

### #1

- 1) Regarding the comments of the reviewer concerning linguistic/stylistic problems, I wholly checked the manuscript and modified accordingly.
- 2) According to the reviewer's comment, we added an explanation for the reason of the prolonged hospital stay.
- 3) According to the reviewer's suggestion, we added the citation of the literature.

### #2

- 1) Same as #1- 1)
- 2) According to the reviewer's comment, we added an explanation for the reason of not choosing the method of cutting the pancreas on a plane left to the portal vein.
- 3) According to the review's comment, we added an explanation and a table about the relationship between the technical variations and POPF.

I believe the manuscript has been improved satisfactory and hope it will be accepted for publication in Innovative Surgical Sciences.  
Sincerely

## Reviewers' Comments to Revision

### Reviewer 1: Sören T. Mees

Jan 18, 2017

|                                                                   |                 |
|-------------------------------------------------------------------|-----------------|
| <b>Reviewer Recommendation Term:</b>                              | Accept          |
| <b>Overall Reviewer Manuscript Rating:</b>                        | 60              |
| <b>Custom Review Questions</b>                                    | <b>Response</b> |
| Is the subject area appropriate for you?                          | 3               |
| Does the title clearly reflect the paper's content?               | 4               |
| Does the abstract clearly reflect the paper's content?            | 4               |
| Do the keywords clearly reflect the paper's content?              | 4               |
| Does the introduction present the problem clearly?                | 4               |
| Are the results/conclusions justified?                            | 4               |
| How comprehensive and up-to-date is the subject matter presented? | 4               |
| How adequate is the data presentation?                            | 4               |
| Are units and terminology used correctly?                         | 4               |
| Is the number of cases adequate?                                  | N/A             |
| Are the experimental methods/clinical studies adequate?           | 4               |
| Is the length appropriate in relation to the content?             | 4               |
| Does the reader get new insights from the article?                | 3               |
| Please rate the practical significance.                           | 3               |
| Please rate the accuracy of methods.                              | 4               |
| Please rate the statistical evaluation and quality control.       | N/A             |
| Please rate the appropriateness of the figures and tables.        | 4               |

|                                                                |     |
|----------------------------------------------------------------|-----|
| Please rate the appropriateness of the references.             | 4   |
| Please evaluate the writing style and use of language.         | 3   |
| Please judge the overall scientific quality of the manuscript. | 3   |
| Are you willing to review the revision of this manuscript?     | Yes |

**Comments to Authors:**

-

**Reviewer 2: Markus K. Diener**

Jan 17, 2017

|                                            |        |
|--------------------------------------------|--------|
| <b>Reviewer Recommendation Term:</b>       | Accept |
| <b>Overall Reviewer Manuscript Rating:</b> | 70     |

**Custom Review Questions**

|                                                                   | <b>Response</b> |
|-------------------------------------------------------------------|-----------------|
| Is the subject area appropriate for you?                          | 5 - High/Yes    |
| Does the title clearly reflect the paper's content?               | 5 - High/Yes    |
| Does the abstract clearly reflect the paper's content?            | 4               |
| Do the keywords clearly reflect the paper's content?              | 5 - High/Yes    |
| Does the introduction present the problem clearly?                | 4               |
| Are the results/conclusions justified?                            | 4               |
| How comprehensive and up-to-date is the subject matter presented? | 4               |
| How adequate is the data presentation?                            | 4               |
| Are units and terminology used correctly?                         | 4               |
| Is the number of cases adequate?                                  | N/A             |
| Are the experimental methods/clinical studies adequate?           | N/A             |
| Is the length appropriate in relation to the content?             | 5 - High/Yes    |
| Does the reader get new insights from the article?                | 4               |
| Please rate the practical significance.                           | 4               |
| Please rate the accuracy of methods.                              | N/A             |
| Please rate the statistical evaluation and quality control.       | N/A             |
| Please rate the appropriateness of the figures and tables.        | 5 - High/Yes    |
| Please rate the appropriateness of the references.                | 4               |
| Please evaluate the writing style and use of language.            | 3               |
| Please judge the overall scientific quality of the manuscript.    | 3               |
| Are you willing to review the revision of this manuscript?        | Yes             |

**Comments to Authors:**

The authors responded adequately to the peer Review comments, and therefore the manuscript was improved significantly.
